# Supplementary material for: Cabozantinib Inhibits Photodynamic Therapy-Induced Auto- and Paracrine MET Signaling in Heterotypic Pancreatic Microtumors
Source: MDPI journal article supplement (doi:10.3390/cancers12061401), 2020-05-29
Supplement: s1 [file s1]

Western Blot – Figure 2  
Experimental repeat 1

Samples prepared on:  
28 March, 2016

- |                    |                     |
|--------------------|---------------------|
| 1. Ladder          |                     |
| 2. MIA PaCa-2      | 3D                  |
| 3. MIA PaCa-2+MRC5 | 3D                  |
| 4. AsPC-1          | 3D                  |
| 5. AsPC-1+MRC5     | 3D                  |
| 6. MIA PaCa-2      | 2D                  |
| 7. MIA PaCa-2+MRC5 | 2D                  |
| 8. AsPC-1          | 2D                  |
| 9. AsPC-1+MRC5     | 2D                  |
| 10. MRC5           | 2D (Not Quantified) |

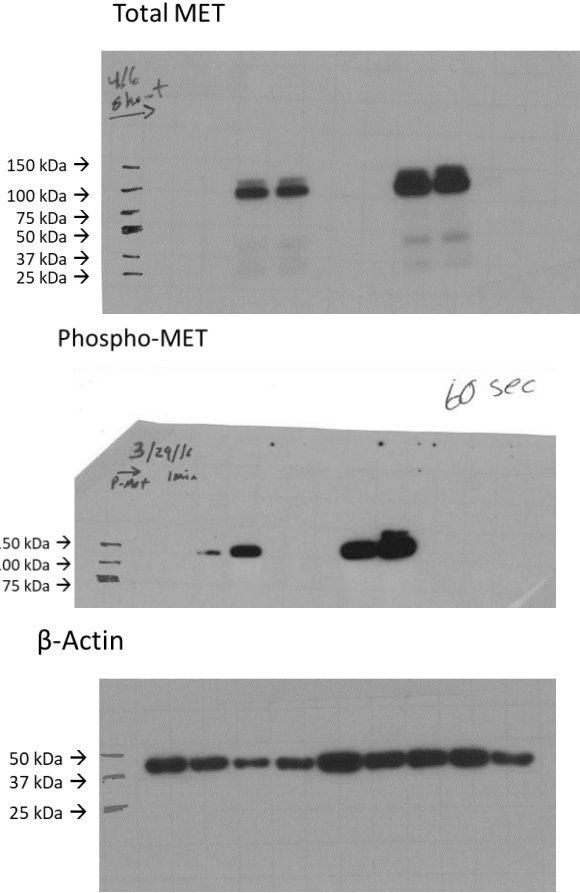

Experimental repeat 2-4

Samples prepared on:  
May 28, 2016

- Blot 1 (Exp. Repeat 2 & 3)
- |                     |    |
|---------------------|----|
| 1. Ladder           |    |
| 2. AsPC-1 (2)       | 3D |
| 3. AsPC-1+ MRC5 (2) | 3D |
| 4. AsPC-1 (3)       | 3D |
| 5. AsPC-1+ MRC5 3)  | 3D |
| 6. Ladder           |    |
| 7. AsPC-1 (2)       | 2D |
| 8. AsPC-1+MRC5 (2)  | 2D |
| 9. AsPC-1 (3)       | 2D |
| 10. AsPC-1+MRC5 (3) | 2D |

Total MET (mirrored)

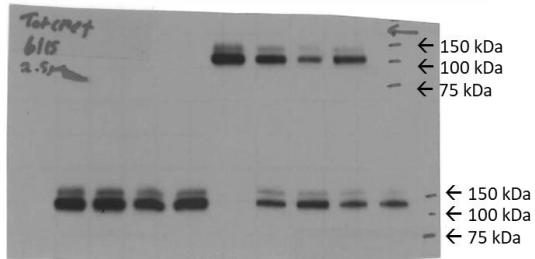

β-Actin (mirrored)

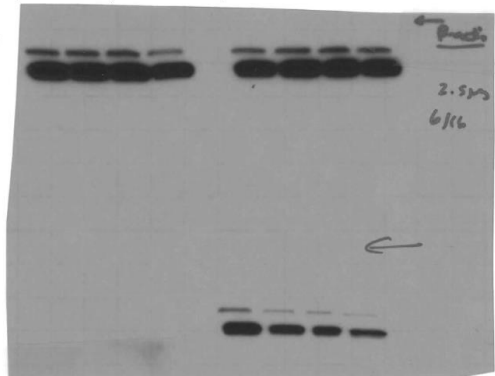

Samples prepared on:  
June 2, 2016

- Blot 2 (Exp. Repeat 4)
- |                     |    |
|---------------------|----|
| 1. Ladder           |    |
| 2. Ladder           |    |
| 2. AsPC-1 (4)       | 3D |
| 3. AsPC-1+ MRC5 (4) | 3D |
| 4. AsPC-1 (4)       | 2D |
| 5. AsPC-1+ MRC5 (4) | 2D |

Phospho-MET

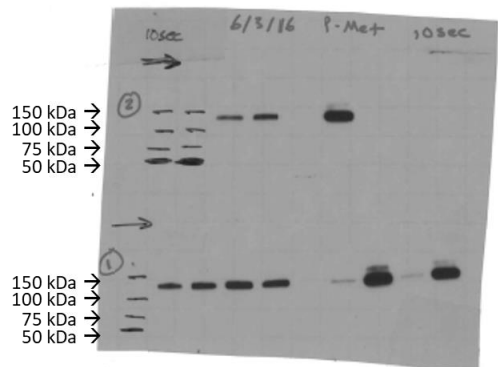

Western Blot – Figure 2  
Densitometry

| Cell line(s)    | Culture type | Exp. Repeat | β-actin   | MET       | phospho-MET |
|-----------------|--------------|-------------|-----------|-----------|-------------|
| MIA PaCa-2      | 2D           | 1           | 22746.602 | 47.95     | 54.778      |
| MIA PaCa-2+MRC5 | 2D           | 1           | 18713.409 | 65.364    | 98.192      |
| AsPC-1          | 2D           | 1           | 11307.075 | 17851.258 | 3330.012    |
| AsPC-1+MRC5     | 2D           | 1           | 15457.56  | 17203.844 | 16559.782   |
| MIA PaCa-2      | 3D           | 1           | 30337.794 | 73.364    | 77.192      |
| MIA PaCa-2+MRC5 | 3D           | 1           | 24556.823 | 89.364    | 63.364      |
| AsPC-1          | 3D           | 1           | 25398.066 | 33791.179 | 26495.459   |
| AsPC-1+MRC5     | 3D           | 1           | 25373.723 | 33106.693 | 38345.238   |
| AsPC-1          | 3D           | 2           | 28880.401 | 7450.539  | 10954.104   |
| AsPC-1+MRC5     | 3D           | 2           | 32589.279 | 8480.803  | 14222.56    |
| AsPC-1          | 3D           | 3           | 32602.643 | 13087.338 | 15076.125   |
| AsPC-1+MRC5     | 3D           | 3           | 26900.501 | 10576.409 | 16452.388   |
| AsPC-1          | 2D           | 2           | 25411.208 | 20125.752 | 7193.619    |
| AsPC-1+MRC5     | 2D           | 2           | 32525.572 | 19457.773 | 29080.723   |
| AsPC-1          | 2D           | 3           | 33164.765 | 24394.673 | 6878.912    |
| AsPC-1+MRC5     | 2D           | 3           | 30323.907 | 24222.894 | 26361.773   |
| AsPC-1          | 3D           | 4           | 8980.347  | 10370.439 | 10323.326   |
| AsPC-1+MRC5     | 3D           | 4           | 10062.175 | 5385.711  | 12162.468   |
| AsPC-1          | 2D           | 4           | 12402.761 | 13483.459 | 723.456     |
| AsPC-1+MRC5     | 2D           | 4           | 16739.246 | 20078.116 | 26485.288   |

Western Blot – Figure 4

Experimental repeat 1

Samples prepared on:  
3 February, 2016

1. Ladder

2. AsPC-1

3. AsPC-1

4. AsPC-1

5. AsPC-1

6. AsPC-1+MRC5

7. AsPC-1+MRC5

8. AsPC-1+MRC5

9. AsPC-1+MRC5

10. AsPC-1+MRC5
- 0h post-PDT

0.5h post-PDT

2.5h post-PDT

8h post-PDT

0h post-PDT

0.5h post-PDT

2.5h post-PDT

5h post-PDT(not quantif.)

8h post-PDT

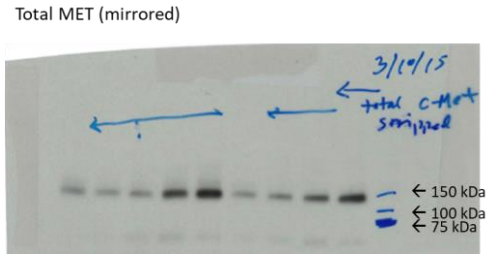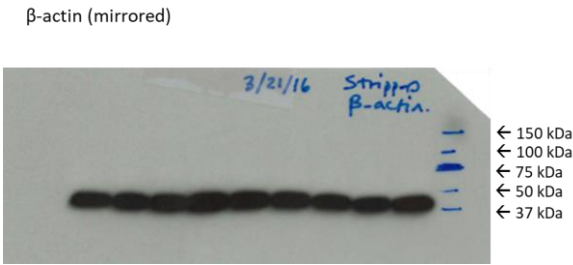

Experimental repeat 2

Samples prepared on:  
11 April, 2016

1. Ladder

2. AsPC-1

3. AsPC-1

4. AsPC-1

5. AsPC-1

6. AsPC-1+MRC5

7. AsPC-1+MRC5

8. AsPC-1+MRC5

9. AsPC-1+MRC5

10. AsPC-1+MRC5
- 0h post-PDT

1h post-PDT

4h post-PDT

24h post-PDT

0h post-PDT

1h post-PDT

4h post-PDT

24h post-PDT

48h post-PDT (not quantif.)

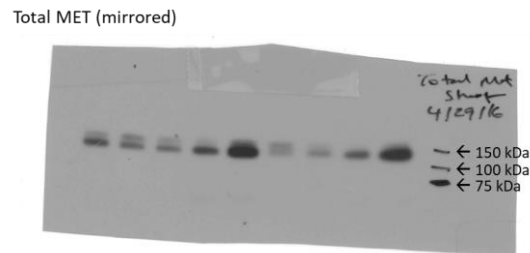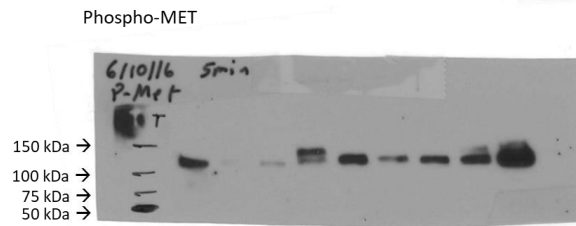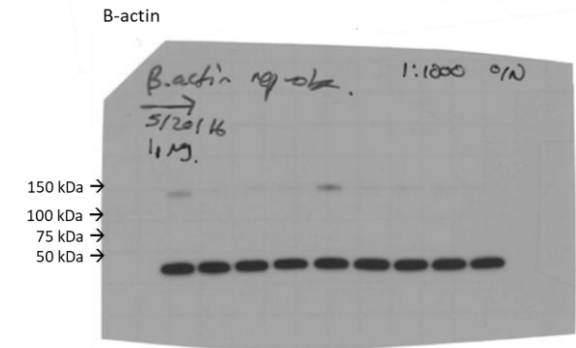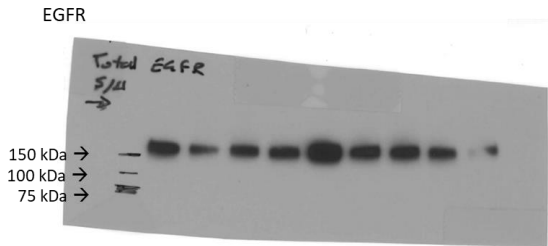

Experimental repeat 3

Samples prepared on:  
July 21, 2016

1. Ladder

2. AsPC-1+MRC5

3. AsPC-1

4. AsPC-1+MRC5

5. AsPC-1

6. AsPC-1+MRC5

7. AsPC-1
- 0h post-PDT

0h post-PDT

24h post-PDT

24h post-PDT

48h post-PDT (not quantified)

48h post-PDT (not quantified)

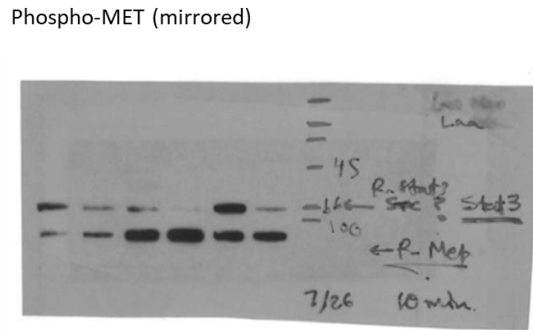

Western Blot – Figure 4  
Densitometry

| Cell line(s) | Hours post-PDT | Exp. Repeat | β-actin   | MET      | phospho-MET |
|--------------|----------------|-------------|-----------|----------|-------------|
| AsPC-1       | 0              | 1           | 15853.51  | 9067.539 | -           |
| AsPC-1       | 0.5            | 1           | 18047.995 | 5372.104 | -           |
| AsPC-1       | 4              | 1           | 19313.53  | 3375.569 | -           |
| AsPC-1       | 8              | 1           | 21504.116 | 2933.983 | -           |
| AsPC-1+MRC5  | 0              | 1           | 17917.388 | 8730.56  | -           |
| AsPC-1+MRC5  | 0.5            | 1           | 16989.51  | 2972.276 | -           |
| AsPC-1+MRC5  | 4              | 1           | 15900.51  | 2604.69  | -           |
| AsPC-1+MRC5  | 8              | 1           | 16823.146 | 3554.347 | -           |
| AsPC-1       | 0              | 2           | 9979.983  | 8325.276 | 4564.033    |
| AsPC-1       | 1              | 2           | 10009.69  | 3070.962 | 99.192      |
| AsPC-1       | 4              | 2           | 9426.033  | 1676.719 | 401.213     |
| AsPC-1       | 24             | 2           | 8867.497  | 2026.648 | 4439.719    |
| AsPC-1+MRC5  | 0              | 2           | 9463.033  | 8908.74  | 4254.891    |
| AsPC-1+MRC5  | 1              | 2           | 10140.154 | 3852.841 | 1664.87     |
| AsPC-1+MRC5  | 4              | 2           | 9577.033  | 2440.426 | 3006.113    |
| AsPC-1+MRC5  | 24             | 2           | 9850.154  | 3043.305 | 4878.134    |
| AsPC-1       | 0              | 3           | -         | -        | 5593.619    |
| AsPC-1       | 24             | 3           | -         | -        | 5859.426    |
| AsPC-1+MRC5  | 0              | 3           | -         | -        | 5138.669    |
| AsPC-1+MRC5  | 24             | 3           | -         | -        | 8033.033    |
